# Supplementary material for: Effect of Nutritional Deprivation after Sleeve Gastrectomy on Bone Mass, Periostin, Sclerostin and Semaphorin 4D: A Two-Year Longitudinal Study
Source: MDPI journal article supplement (doi:10.3390/nu15204310), 2023-10-10
Supplement: s1 [file s1]

**Supplemental materials Table S1.** Influence of various anthropometric and biological variables on whole-body aBMD variation at 12

months.

|                                                                                              |        | % relative variation ( $\Delta$ 12m-baseline/baseline) of the whole body aBMD |        |         |                                 |       |         |
|----------------------------------------------------------------------------------------------|--------|-------------------------------------------------------------------------------|--------|---------|---------------------------------|-------|---------|
| Continuous variables<br>expressed as % relative variation ( $\Delta$ 12m-baseline/baseline)] |        | Univariate analysis                                                           |        |         | Multivariate analysis<br>(n=68) |       |         |
|                                                                                              |        | $\beta$                                                                       | SE     | p-value | $\beta$                         | SE    | p-value |
| Age at baseline                                                                              | 71     | -0.012                                                                        | 0.029  | 0.686   |                                 |       |         |
| Weight                                                                                       | 71     | -0.009                                                                        | 0.043  | 0.834   |                                 |       |         |
| BMI                                                                                          | 71     | -0.009                                                                        | 0.043  | 0.825   |                                 |       |         |
| Calcium                                                                                      | 71     | 0.05                                                                          | 0.115  | 0.668   |                                 |       |         |
| Phosphorus                                                                                   | 71     | 0.005                                                                         | 0.019  | 0.790   |                                 |       |         |
| iPTH                                                                                         | 71     | -0.023                                                                        | 0.011  | 0.038   | -0.024                          | 0.011 | 0.024   |
| 25(OH)D3                                                                                     | 71     | 0.01                                                                          | 0.009  | 0.279   |                                 |       |         |
| Albumin                                                                                      | 69     | 0.057                                                                         | 0.049  | 0.244   |                                 |       |         |
| Osteocalcin                                                                                  | 71     | -0.01                                                                         | 0.006  | 0.079   | -0.009                          | 0.005 | 0.085   |
| CTX                                                                                          | 70     | -0.003                                                                        | 0.002  | 0.107   |                                 |       |         |
| Periostin                                                                                    | 71     | -0.029                                                                        | 0.016  | 0.086   |                                 |       |         |
| Sclerostin                                                                                   | 71     | -0.004                                                                        | 0.018  | 0.820   |                                 |       |         |
| Semaphorin                                                                                   | 71     | -0.015                                                                        | 0.021  | 0.469   |                                 |       |         |
| Categorical variables at baseline                                                            |        |                                                                               |        |         |                                 |       |         |
| Gender                                                                                       | Male   | 16/71                                                                         | 2.304  | 0.787   | 2.63                            | 0.754 | 0.001   |
|                                                                                              | Female | 55/71                                                                         | -      | -       |                                 |       |         |
| Hypertension                                                                                 | Yes    | 29/71                                                                         | -0.122 | 0.709   |                                 |       |         |
|                                                                                              | No     | 42/71                                                                         | -      | -       |                                 |       |         |
| Type 2 diabetes mellitus                                                                     | Yes    | 13/71                                                                         | -0.003 | 0.901   |                                 |       |         |
|                                                                                              | No     | 58/71                                                                         |        |         |                                 |       |         |
| Sleep apnoea                                                                                 | No     | 27/71                                                                         | -0.946 | 0.709   |                                 |       |         |
|                                                                                              | Yes    | 44/71                                                                         | -      | -       |                                 |       |         |

**Legend:** BMI: body mass index, iPTH: intact parathyroid hormone; 25(OH)D3: 25 vitamin D; CTX: type I-C telopeptide breakdown products.  $\Delta$  12m-baseline/baseline represents the % relative difference between values at 12 months and baseline.  $c\beta$ : crude standardized coefficients;  $a\beta$ : adjusted standardized coefficients; SE: standard error. P-values were from linear regression analysis.

**Supplemental materials Table S2.** Influence of various anthropometric and biological variables on whole-body aBMD variation at 24 months.

|                                                                                          |        | % relative variation ( $\Delta$ 24m-baseline/baseline) of the whole body aBMD |                     |       |         |                              |         |
|------------------------------------------------------------------------------------------|--------|-------------------------------------------------------------------------------|---------------------|-------|---------|------------------------------|---------|
| Continuous variables expressed as % relative variation ( $\Delta$ 12m-baseline/baseline) |        | N                                                                             | Univariate analysis |       |         | Multivariate analysis (n=55) |         |
|                                                                                          |        |                                                                               | $\beta$             | SE    | p-value | $\beta$                      | p-value |
| Age at baseline                                                                          |        | 58                                                                            | -0.096              | 0.059 | 0.108   | -0.086                       | 0.096   |
| Weight                                                                                   |        | 58                                                                            | -0.067              | 0.075 | 0.376   |                              |         |
| BMI                                                                                      |        | 56                                                                            | -0.073              | 0.075 | 0.334   |                              |         |
| Calcium                                                                                  |        | 58                                                                            | -0.136              | 0.221 | 0.542   | -0.452                       | 0.041   |
| Phosphorus                                                                               |        | 58                                                                            | 0.037               | 0.038 | 0.329   |                              |         |
| iPTH                                                                                     |        | 58                                                                            | -0.048              | 0.013 | 0.001   | -0.046                       | 0.003   |
| 25(OH)D3                                                                                 |        | 58                                                                            | 0.018               | 0.012 | 0.135   | 0.022                        | 0.044   |
| Albumin                                                                                  |        | 56                                                                            | 0.051               | 0.085 | 0.551   |                              |         |
| Osteocalcin                                                                              |        | 56                                                                            | -0.043              | 0.012 | <0.001  | -0.031                       | 0.005   |
| CTX                                                                                      |        | 57                                                                            | -0.005              | 0.004 | 0.169   |                              |         |
| Periostin                                                                                |        | 57                                                                            | 0.027               | 0.032 | 0.402   |                              |         |
| Sclerostin                                                                               |        | 57                                                                            | 0.119               | 0.041 | 0.005   | 0.058                        | 0.121   |
| Semaphorin                                                                               |        | 53                                                                            | -0.032              | 0.025 | 0.218   |                              |         |
| Categorical variables at baseline                                                        |        |                                                                               |                     |       |         |                              |         |
| Gender                                                                                   | Male   | 14/58                                                                         | -0.120              | 1.670 | 0.943   |                              |         |
|                                                                                          | Female | 44/58                                                                         | -                   | -     | -       |                              |         |
| Hypertension                                                                             | Yes    | 26/58                                                                         | -2.013              | 1.411 | 0.159   |                              |         |
|                                                                                          | No     | 32/58                                                                         | -                   | -     | -       |                              |         |
| Type 2 diabetes mellitus at baseline                                                     | Yes    | 14/58                                                                         | -1.652              | 1.655 | 0.323   | 3.275                        | 0.047   |
|                                                                                          | No     | 44/58                                                                         | -                   | -     | -       | 1.602                        |         |
| Sleep apnoea                                                                             | No     | 22/58                                                                         | 1.114               | 1.465 | 0.450   |                              |         |
|                                                                                          | Yes    | 36/58                                                                         | -                   | -     | -       |                              |         |

**Legend:** BMI: body mass index, iPTH: intact parathyroid hormone; 25(OH)D3: 25 vitamin D; CTX: type I-C telopeptide breakdown products.  $\Delta$  12m-baseline/baseline represents the % relative difference between values at 12 months and baseline.  $\beta$ : crude standardized coefficients;  $\beta$ : adjusted standardized coefficients; SE: standard error. P-values were from linear regression analysis.

**Supplemental materials Table S3.** Influence of various anthropometric and biological variables on total hip aBMD variation at 12 months.

|                                                                                          |        | % relative variation ( $\Delta$ 12m-baseline/baseline) of the total hip aBMD |                     |       |                  |                              |              |
|------------------------------------------------------------------------------------------|--------|------------------------------------------------------------------------------|---------------------|-------|------------------|------------------------------|--------------|
| Continuous variables expressed as % relative variation ( $\Delta$ 12m-baseline/baseline) |        | N                                                                            | Univariate analysis |       |                  | Multivariate analysis (n=71) |              |
|                                                                                          |        |                                                                              | $\epsilon\beta$     | SE    | P-value          | $\alpha\beta$                | P-value      |
| Age at baseline                                                                          |        | 74                                                                           | 0.030               | 0.041 | 0.461            |                              |              |
| Weight                                                                                   |        | 74                                                                           | 0.237               | 0.052 | <b>&lt;0.001</b> | 0.178                        | <b>0.002</b> |
| BMI                                                                                      |        | 74                                                                           | 0.236               | 0.052 | <b>&lt;0.001</b> |                              |              |
| Calcium                                                                                  |        | 74                                                                           | 0.160               | 0.162 | 0.329            |                              |              |
| Phosphorus                                                                               |        | 74                                                                           | -0.007              | 0.026 | 0.790            | 0.038                        | 0.119        |
| iPTH                                                                                     |        | 74                                                                           | 0.045               | 0.015 | <b>0.004</b>     | 0.043                        | <b>0.005</b> |
| 25(OH)D3                                                                                 |        | 74                                                                           | -0.003              | 0.012 | 0.793            |                              |              |
| Albumin                                                                                  |        | 72                                                                           | 0.040               | 0.069 | 0.570            |                              |              |
| Osteocalcin                                                                              |        | 73                                                                           | -0.01               | 0.008 | 0.231            | -0.017                       | <b>0.025</b> |
| CTX                                                                                      |        | 73                                                                           | 0.001               | 0.002 | 0.560            |                              |              |
| Periostin                                                                                |        | 74                                                                           | 0.003               | 0.024 | 0.914            |                              |              |
| Sclerostin                                                                               |        | 74                                                                           | 0.008               | 0.026 | 0.766            |                              |              |
| Semaphorin                                                                               |        | 74                                                                           | 0.052               | 0.03  | 0.084            | 0.036                        | 0.175        |
| Categorical variables at baseline                                                        |        |                                                                              |                     |       |                  |                              |              |
| Gender                                                                                   | Male   | 18/74                                                                        | 1.885               | 1.124 | 0.098            | 1.578                        | 0.148        |
|                                                                                          | Female | 56/74                                                                        |                     |       |                  |                              |              |
| Hypertension                                                                             | Yes    | 31/74                                                                        | -0.083              | 0.996 | 0.934            |                              |              |
|                                                                                          | No     | 43/74                                                                        |                     |       |                  |                              |              |
| Type 2 diabetes mellitus                                                                 | Yes    | 14/74                                                                        | 1.063               | 1.248 | 0.397            |                              |              |
|                                                                                          | No     | 60/74                                                                        |                     |       |                  |                              |              |
| Sleep apnoea                                                                             | No     | 27/74                                                                        | 0.908               | 1.015 | 0.374            | 1.673                        | 0.080        |
|                                                                                          | Yes    | 47/74                                                                        |                     |       |                  |                              |              |

**Legend:** BMI: body mass index, iPTH: intact parathyroid hormone; 25(OH)D3: 25 vitamin D; CTX: type I-C telopeptide breakdown products.  $\Delta$  12m-baseline/baseline represents the % relative difference between values at 12 months and baseline.  $\epsilon\beta$ : crude standardized coefficients;  $\alpha\beta$ : adjusted standardized coefficients; SE: standard error. P-values were from linear regression analysis.

**Supplemental materials Table S4.** Influence of various anthropometric and biological variables on total hip aBMD variation at 24 months.

|                                                                                          |        | % relative variation ( $\Delta$ 24m-baseline/baseline) of the total hip aBMD |                     |       |                  |                              |              |
|------------------------------------------------------------------------------------------|--------|------------------------------------------------------------------------------|---------------------|-------|------------------|------------------------------|--------------|
| Continuous variables expressed as % relative variation ( $\Delta$ 12m-baseline/baseline) |        | N                                                                            | Univariate analysis |       |                  | Multivariate analysis (n=53) |              |
|                                                                                          |        |                                                                              | $\epsilon\beta$     | SE    | p-value          | $a\beta$                     | p-value      |
| Age at baseline                                                                          |        | 60                                                                           | 0.02                | 0.051 | 0.703            |                              |              |
| Weight                                                                                   |        | 60                                                                           | 0.209               | 0.056 | <b>&lt;0.001</b> | 0.170                        | <b>0.003</b> |
| BMI                                                                                      |        | 58                                                                           | 0.206               | 0.057 | <b>0.001</b>     |                              |              |
| Calcium                                                                                  |        | 60                                                                           | -0.101              | 0.188 | 0.592            |                              |              |
| Phosphorus                                                                               |        | 60                                                                           | -0.014              | 0.032 | 0.675            |                              |              |
| iPTH                                                                                     |        | 60                                                                           | -0.001              | 0.012 | 0.917            |                              |              |
| 25(OH)D3                                                                                 |        | 60                                                                           | 0.009               | 0.01  | 0.385            |                              |              |
| Albumin                                                                                  |        | 58                                                                           | -0.021              | 0.07  | 0.761            |                              |              |
| Osteocalcin                                                                              |        | 58                                                                           | -0.039              | 0.009 | <b>&lt;0.001</b> | -0.030                       | <b>0.009</b> |
| CTX                                                                                      |        | 59                                                                           | -0.004              | 0.003 | 0.227            |                              |              |
| Periostin                                                                                |        | 59                                                                           | -0.014              | 0.027 | 0.595            |                              |              |
| Sclerostin                                                                               |        | 59                                                                           | 0.067               | 0.035 | 0.06             | 0.050                        | 0.029        |
| Semaphorin                                                                               |        | 55                                                                           | 0.051               | 0.021 | <b>0.021</b>     | 0.043                        | <b>0.017</b> |
| Categorical variables at baseline                                                        |        |                                                                              |                     |       |                  |                              |              |
| Gender                                                                                   | Male   | 16/60                                                                        | 0.906               | 1.346 | 0.504            |                              |              |
|                                                                                          | Female | 44/60                                                                        |                     |       |                  |                              |              |
| Hypertension                                                                             | Yes    | 27/60                                                                        | -0.843              | 1.196 | 0.484            |                              |              |
|                                                                                          | No     | 33/60                                                                        |                     |       |                  |                              |              |
| Type 2 diabetes mellitus                                                                 | Yes    | 15/60                                                                        | -0.707              | 1.377 | 0.610            |                              |              |
|                                                                                          | No     | 45/60                                                                        |                     |       |                  |                              |              |
| Sleep apnoea                                                                             | No     | 22/60                                                                        | 0.133               | 1.24  | 0.915            |                              |              |
|                                                                                          | Yes    | 38/60                                                                        |                     |       |                  |                              |              |

**Legend:** BMI: body mass index, iPTH: intact parathyroid hormone; 25(OH)D3: 25 vitamin D; CTX: type I-C telopeptide breakdown products.  $\Delta$  12m-baseline/baseline represents the % relative difference between values at 12 months and baseline.  $\epsilon\beta$ : crude standardized coefficients;  $a\beta$ : adjusted standardized coefficients; SE: standard error. P-values were from linear regression analysis.

**Supplemental materials Table S5.** Influence of various anthropometric and biological variables on lumbar spine aBMD variation at 12 months.

|                                                                                          |        | % relative variation ( $\Delta$ 12m-baseline/baseline) of the lumbar spine aBMD |                     |       |                  |                              |                  |
|------------------------------------------------------------------------------------------|--------|---------------------------------------------------------------------------------|---------------------|-------|------------------|------------------------------|------------------|
| Continuous variables expressed as % relative variation ( $\Delta$ 12m-baseline/baseline) |        | n                                                                               | Univariate analysis |       |                  | Multivariate analysis (n=68) |                  |
|                                                                                          |        |                                                                                 | $\epsilon\beta$     | SE    | p-value          | $\alpha\beta$                | p-value          |
| Age at baseline                                                                          |        | 72                                                                              | -0.003              | 0.041 | 0.95             |                              |                  |
| Weight                                                                                   |        | 72                                                                              | 0.193               | 0.054 | <b>0.001</b>     | 0.173                        | <b>&lt;0.001</b> |
| BMI                                                                                      |        | 72                                                                              | 0.193               | 0.054 | <b>0.001</b>     |                              |                  |
| Calcium                                                                                  |        | 72                                                                              | 0.238               | 0.161 | 0.144            | 0.365                        | <b>0.012</b>     |
| Phosphorus                                                                               |        | 72                                                                              | -0.031              | 0.028 | 0.275            | 0.036                        | 0.130            |
| iPTH                                                                                     |        | 72                                                                              | -0.026              | 0.016 | 0.102            |                              |                  |
| 25(OH)D3                                                                                 |        | 72                                                                              | 0.002               | 0.012 | 0.846            | 0.016                        | 0.099            |
| Albumin                                                                                  |        | 70                                                                              | -0.159              | 0.067 | <b>0.021</b>     | -0.200                       | <b>0.0006</b>    |
| Osteocalcin                                                                              |        | 71                                                                              | -0.029              | 0.007 | <b>&lt;0.001</b> | -0.023                       | <b>0.0011</b>    |
| CTX                                                                                      |        | 71                                                                              | -0.003              | 0.002 | 0.169            | 0.005                        | <b>0.0182</b>    |
| Periostin                                                                                |        | 72                                                                              | -0.014              | 0.024 | 0.542            |                              |                  |
| Sclerostin                                                                               |        | 72                                                                              | 0.03                | 0.025 | 0.241            |                              |                  |
| Semaphorin                                                                               |        | 72                                                                              | -0.005              | 0.03  | 0.874            |                              |                  |
| Categorical variables at baseline                                                        |        |                                                                                 |                     |       |                  |                              |                  |
| Gender                                                                                   | Male   | 16/72                                                                           | 2.348               | 1.151 | <b>0.045</b>     |                              |                  |
|                                                                                          | Female | 56/72                                                                           |                     |       |                  |                              |                  |
| Hypertension                                                                             | Yes    | 29/72                                                                           | 0.192               | 1.004 | 0.849            |                              |                  |
|                                                                                          | No     | 43/72                                                                           |                     |       |                  |                              |                  |
| Type 2 diabetes mellitus                                                                 | Yes    | 14/72                                                                           | 1.060               | 1.238 | 0.395            | 1.880                        | 0.068            |
|                                                                                          | No     | 58/72                                                                           |                     |       |                  |                              |                  |
| Sleep apnoea                                                                             | No     | 27/72                                                                           | -0.274              | 1.017 | 0.788            |                              |                  |
|                                                                                          | Yes    | 45/72                                                                           |                     |       |                  |                              |                  |

**Legend:** BMI: body mass index, iPTH: intact parathyroid hormone; 25(OH)D3: 25 vitamin D; CTX: type I-C telopeptide breakdown products.  $\Delta$  12m-baseline/baseline represents the % relative difference between values at 12 months and baseline.  $\epsilon\beta$ : crude standardized coefficients;  $\alpha\beta$ : adjusted standardized coefficients; SE: standard error. P-values were from linear regression analysis.

**Supplemental materials Table S6.** Influence of various anthropometric and biological variables on lumbar spine aBMD variation at 24 months.

|                                                                                     |                | % relative variation (Δ 24m-baseline/baseline) of the lumbar spine aBMD |                     |       |                  |                                 |       |                  |
|-------------------------------------------------------------------------------------|----------------|-------------------------------------------------------------------------|---------------------|-------|------------------|---------------------------------|-------|------------------|
| Continuous variables<br>expressed as % relative variation (Δ 12m-baseline/baseline) |                | n                                                                       | Univariate analysis |       |                  | Multivariate analysis<br>(n=56) |       |                  |
|                                                                                     |                |                                                                         | c β                 | SE    | p-value          | a β                             | SE    | p-value          |
| Age at baseline                                                                     |                | 59                                                                      | 0.002               | 0.056 | 0.975            |                                 |       |                  |
| Weight                                                                              |                | 59                                                                      | 0.11                | 0.067 | 0.107            | 0.093                           | 0.057 | 0.111            |
| BMI                                                                                 |                | 57                                                                      | 0.107               | 0.068 | 0.121            |                                 |       |                  |
| Calcium                                                                             |                | 59                                                                      | 0.328               | 0.201 | 0.108            | 0.342                           | 0.172 | 0.053            |
| Phosphorus                                                                          |                | 59                                                                      | -0.009              | 0.036 | 0.801            |                                 |       |                  |
| iPTH                                                                                |                | 59                                                                      | -0.032              | 0.013 | <b>0.017</b>     |                                 |       |                  |
| 25(OH)D3                                                                            |                | 59                                                                      | 0.03                | 0.011 | <b>0.007</b>     | 0.019                           | 0.009 | <b>0.044</b>     |
| Albumin                                                                             |                | 57                                                                      | 0.11                | 0.079 | 0.166            |                                 |       |                  |
| Osteocalcin                                                                         |                | 57                                                                      | -0.041              | 0.011 | <b>&lt;0.001</b> | -0.048                          | 0.009 | <b>&lt;.0001</b> |
| CTX                                                                                 |                | 58                                                                      | 0.002               | 0.004 | 0.562            |                                 |       |                  |
| Periostin                                                                           |                | 58                                                                      | 0.044               | 0.029 | 0.133            | 0.074                           | 0.023 | <b>0.002</b>     |
| Sclerostin                                                                          |                | 58                                                                      | 0.062               | 0.038 | 0.110            |                                 |       |                  |
| Semaphorin                                                                          |                | 54                                                                      | -0.007              | 0.024 | 0.784            |                                 |       |                  |
| Categorical variables at baseline                                                   |                |                                                                         |                     |       |                  |                                 |       |                  |
| Gender                                                                              | Male<br>Female | 15/59<br>44/59                                                          | 2.449               | 1.477 | 0.103            | 2.315                           | 1.171 | 0.054            |
| Hypertension                                                                        | Yes<br>No      | 26/59<br>33/59                                                          | 0.221               | 1.326 | 0.868            |                                 |       |                  |
| Type 2 diabetes mellitus                                                            | Yes<br>No      | 15/59<br>44/59                                                          | 1.828               | 1.493 | 0.226            |                                 |       |                  |
| Sleep apnoea                                                                        | No<br>Yes      | 22/59<br>37/59                                                          | -1.328              | 1.35  | 0.329            |                                 |       |                  |

**Legend:** BMI: body mass index, iPTH: intact parathyroid hormone; 25(OH)D3: 25 vitamin D; CTX: type I-C telopeptide breakdown products.  $\Delta$  12m-baseline/baseline represents the % relative difference between values at 12 months and baseline.  $\beta_c$ : crude standardized coefficients;  $\beta_a$ : adjusted standardized coefficients; SE: standard error. P-values were from linear regression analysis.

**Supplemental materials Table S7.** Influence of various anthropometric and biological variables on radius aBMD variation at 12 months.

|                                                                                             |        | % relative variation ( $\Delta$ 12m-baseline/baseline) of the radius |                     |       |              |                                 |              |
|---------------------------------------------------------------------------------------------|--------|----------------------------------------------------------------------|---------------------|-------|--------------|---------------------------------|--------------|
| Continuous variables<br>expressed as % relative variation ( $\Delta$ 12m-baseline/baseline) |        | n                                                                    | Univariate analysis |       |              | Multivariate analysis<br>(n=74) |              |
|                                                                                             |        |                                                                      | $_{\text{c}}\beta$  | SE    | p-value      | $_{\text{a}}\beta$              | p-value      |
| Age at baseline                                                                             |        | 74                                                                   | 0.013               | 0.015 | 0.387        |                                 |              |
| Weight                                                                                      |        | 74                                                                   | 0.057               | 0.021 | <b>0.008</b> | 0.057                           | <b>0.008</b> |
| BMI                                                                                         |        | 74                                                                   | 0.057               | 0.021 | <b>0.008</b> |                                 |              |
| Calcium                                                                                     |        | 74                                                                   | 0.059               | 0.061 | 0.337        |                                 |              |
| Phosphorus                                                                                  |        | 74                                                                   | 0.013               | 0.01  | 0.183        |                                 |              |
| iPTH                                                                                        |        | 74                                                                   | 0.006               | 0.006 | 0.329        |                                 |              |
| 25(OH)D3                                                                                    |        | 74                                                                   | 0.004               | 0.005 | 0.334        |                                 |              |
| Albumin                                                                                     |        | 72                                                                   | -0.004              | 0.026 | 0.888        |                                 |              |
| Osteocalcin                                                                                 |        | 73                                                                   | 0.002               | 0.003 | 0.452        |                                 |              |
| CTX                                                                                         |        | 73                                                                   | -0.0002             | 0.001 | 0.835        |                                 |              |
| Periostin                                                                                   |        | 74                                                                   | 0.002               | 0.009 | 0.855        |                                 |              |
| Sclerostin                                                                                  |        | 74                                                                   | -0.005              | 0.01  | 0.607        |                                 |              |
| Semaphorin                                                                                  |        | 74                                                                   | 0.008               | 0.011 | 0.466        |                                 |              |
| <b>Categorical variables at baseline</b>                                                    |        |                                                                      |                     |       |              |                                 |              |
| Gender                                                                                      | Male   | 18/74                                                                | 0.590               | 0.423 | 0.167        |                                 |              |
|                                                                                             | Female | 56/74                                                                |                     |       |              |                                 |              |
| Hypertension                                                                                | Yes    | 31/74                                                                | 0.190               | 0.372 | 0.611        |                                 |              |
|                                                                                             | No     | 43/74                                                                |                     |       |              |                                 |              |
| Type 2 diabetes mellitus                                                                    | Yes    | 14/74                                                                | 0.853               | 0.458 | 0.067        |                                 |              |
|                                                                                             | No     | 60/74                                                                |                     |       |              |                                 |              |
| Sleep apnoea                                                                                | No     | 27/74                                                                | -0.269              | 0.38  | 0.483        |                                 |              |
|                                                                                             | Yes    | 47/74                                                                |                     |       |              |                                 |              |

**Legend:** BMI: body mass index; iPTH: intact parathyroid hormone; 25(OH)D3: 25 vitamin D; CTX: type I-C telopeptide breakdown products.  $\Delta$  12m-baseline/baseline represents the % relative difference between values at 12 months and baseline.  $_{\text{c}}\beta$ : crude standardized coefficients;  $_{\text{a}}\beta$ : adjusted standardized coefficients; SE: standard error. P-values were from linear regression analysis.



**Supplemental materials Table S8.** Influence of various anthropometric and biological variables on radius aBMD variation at 24 months.

|                                                                                             |        | % relative variation ( $\Delta$ 24m-baseline/baseline) of the radius |                     |       |              |                                 |              |
|---------------------------------------------------------------------------------------------|--------|----------------------------------------------------------------------|---------------------|-------|--------------|---------------------------------|--------------|
| Continuous variables<br>expressed as % relative variation ( $\Delta$ 12m-baseline/baseline) |        | n                                                                    | Univariate analysis |       |              | Multivariate analysis<br>(n=59) |              |
|                                                                                             |        |                                                                      | $\epsilon\beta$     | SE    | p-value      | $a\beta$                        | p-value      |
| Age at baseline                                                                             |        | 60                                                                   | -0.003              | 0.027 | 0.916        |                                 |              |
| Weight                                                                                      |        | 60                                                                   | 0.075               | 0.031 | <b>0.021</b> | 0.090                           | <b>0.003</b> |
| BMI                                                                                         |        | 58                                                                   | 0.072               | 0.031 | <b>0.025</b> |                                 |              |
| Calcium                                                                                     |        | 60                                                                   | 0.015               | 0.099 | 0.883        |                                 |              |
| Phosphorus                                                                                  |        | 60                                                                   | 0.009               | 0.017 | 0.605        |                                 |              |
| iPTH                                                                                        |        | 60                                                                   | -0.018              | 0.006 | <b>0.005</b> | -0.018                          | <b>0.006</b> |
| 25(OH)D3                                                                                    |        | 60                                                                   | 0.005               | 0.005 | 0.399        |                                 |              |
| Albumin                                                                                     |        | 58                                                                   | -0.052              | 0.038 | 0.172        |                                 |              |
| Osteocalcin                                                                                 |        | 58                                                                   | -0.009              | 0.006 | 0.101        |                                 |              |
| CTX                                                                                         |        | 59                                                                   | -0.002              | 0.002 | 0.284        |                                 |              |
| Periostin                                                                                   |        | 59                                                                   | 0.003               | 0.014 | 0.807        |                                 |              |
| Sclerostin                                                                                  |        | 59                                                                   | 0.054               | 0.017 | <b>0.003</b> | 0.033                           | <b>0.050</b> |
| Semaphorin                                                                                  |        | 55                                                                   | 0.013               | 0.01  | 0.198        |                                 |              |
| <b>Categorical variables at baseline</b>                                                    |        |                                                                      |                     |       |              |                                 |              |
| Gender                                                                                      | Male   | 16/60                                                                | 1.008               | 0.698 | 0.154        |                                 |              |
|                                                                                             | Female | 44/60                                                                |                     |       |              |                                 |              |
| Hypertension                                                                                | Yes    | 27/60                                                                | -0.504              | 0.628 | 0.425        |                                 |              |
|                                                                                             | No     | 33/60                                                                |                     |       |              |                                 |              |
| Type 2 diabetes mellitus                                                                    | Yes    | 15/60                                                                | 0.055               | 0.725 | 0.940        |                                 |              |
|                                                                                             | No     | 45/60                                                                |                     |       |              |                                 |              |
| Sleep apnoea                                                                                | No     | 22/60                                                                | -0.337              | 0.65  | 0.607        |                                 |              |
|                                                                                             | Yes    | 38/60                                                                |                     |       |              |                                 |              |

**Legend:** BMI: body mass index, iPTH: intact parathyroid hormone; 25(OH)D3: 25 vitamin D; CTX: type I-C telopeptide breakdown products.  $\Delta$  12m-baseline/baseline represents the % relative difference between values at 12 months and baseline.  $\epsilon\beta$ : crude standardized coefficients;  $a\beta$ : adjusted standardized coefficients; SE: standard error. P-values were from linear regression analysis
